# Supplementary material for: Exploring the Psychological Impacts of COVID-19 Social Restrictions on International University Students: A Qualitative Study
Source: MDPI journal article supplement (doi:10.3390/ijerph19137631), 2022-06-22
Supplement: s1 [file s1]

**Supplementary file S1.** Consolidated criteria for reporting qualitative studies (COREQ): 32-item checklist

| Topic and Item No.                             | Guide Questions/Description                                                                                                                              | Response                                                                                                                                                                                     |
|------------------------------------------------|----------------------------------------------------------------------------------------------------------------------------------------------------------|----------------------------------------------------------------------------------------------------------------------------------------------------------------------------------------------|
| <b>Domain 1: Research team and reflexivity</b> |                                                                                                                                                          |                                                                                                                                                                                              |
| <i>Personal Characteristics</i>                |                                                                                                                                                          |                                                                                                                                                                                              |
| 1. Interviewer/facilitator                     | Which author/s conducted the interview or focus group?                                                                                                   | Amani Al-Oraibi, Lauren Fothergill, Mehmet Yildirim                                                                                                                                          |
| 2. Credentials                                 | What were the researcher's credentials? E.g. PhD, MD                                                                                                     | PhD researchers                                                                                                                                                                              |
| 3. Occupation                                  | What was their occupation at the time of the study?                                                                                                      | Research Associates (Health Sciences)                                                                                                                                                        |
| 4. Gender                                      | Was the researcher male or female?                                                                                                                       | Female (AA, LF), Male (MY)                                                                                                                                                                   |
| 5. Experience and training                     | What experience or training did the researcher have?                                                                                                     | Mixed methods researchers, experienced interviewers and focus group moderators, GCP trained                                                                                                  |
| <i>Relationship with participants</i>          |                                                                                                                                                          |                                                                                                                                                                                              |
| 6. Relationship established                    | Was a relationship established prior to study commencement?                                                                                              | Researchers met the participants during recruitment                                                                                                                                          |
| 7. Participant knowledge of the interviewer    | What did the participants know about the researcher? e.g., personal goals, reasons for doing the research                                                | Participants knew that the interviewers were university researchers. They knew that the interviewers were not involved in the delivery of the asymptomatic testing service or RB-TPP scheme. |
| 8. Interviewer characteristics                 | What characteristics were reported about the interviewer/facilitator? e.g., Bias, assumptions, reasons, and interests in the research topic              | Participants knew that AA, LF and MY and LF were interested in the experiences of students during the COVID-19 pandemic.                                                                     |
| <b>Domain 2: Study design</b>                  |                                                                                                                                                          |                                                                                                                                                                                              |
| <i>Theoretical framework</i>                   |                                                                                                                                                          |                                                                                                                                                                                              |
| 9. Methodological orientation and theory       | What methodological orientation was stated to underpin the study? e.g. grounded theory, discourse analysis, ethnography, phenomenology, content analysis | Thematic analysis                                                                                                                                                                            |
| <i>Participant selection</i>                   |                                                                                                                                                          |                                                                                                                                                                                              |
| 10. Sampling                                   | How were participants selected? e.g. purposive, convenience, consecutive, snowball                                                                       | Purposive sampling                                                                                                                                                                           |
| 11. Method of approach                         | How were participants approached? e.g. face-to-face, telephone, mail, email                                                                              | Participants were approached and recruited by email                                                                                                                                          |
| 12. Sample size                                | How many participants were in the study?                                                                                                                 | Students: 29 across 8 focus groups.<br>Staff: 17 interviewed.                                                                                                                                |
| 13. Non-participation                          | How many people refused to participate or dropped out? Reasons?                                                                                          | No participants actively withdrew.                                                                                                                                                           |
| <i>Setting</i>                                 |                                                                                                                                                          |                                                                                                                                                                                              |
| 14. Setting of data collection                 | Where was the data collected? e.g., home, clinic, workplace                                                                                              | Data were collected online (video-conferencing platform)                                                                                                                                     |
| 15. Presence of non-participants               | Was anyone else present besides the participants and researchers?                                                                                        | No                                                                                                                                                                                           |

|                                        |                                                                                    |                                                                                                                                                                                                                                                                                                                                                                                                                                                                                                                                                                                                                                                                                                            |
|----------------------------------------|------------------------------------------------------------------------------------|------------------------------------------------------------------------------------------------------------------------------------------------------------------------------------------------------------------------------------------------------------------------------------------------------------------------------------------------------------------------------------------------------------------------------------------------------------------------------------------------------------------------------------------------------------------------------------------------------------------------------------------------------------------------------------------------------------|
| 16. Description of sample              | What are the important characteristics of the sample? e.g., demographic data, date | <p>Students: Nationalities, living circumstances (on/off campus), and experiences of COVID-19 (i.e., those who had recently tested positive for COVID-19, or never tested positive), and specifically targeted students who had experienced at least one period of self-isolation.</p> <p>Staff: to represented diversity of occupational role and nature of student contact. Specifically, staff were invited to participate if they held a role providing direct support for international students, provided accommodation support, mental health support or other student-facing services, or worked in another role with a responsibility for pastoral care (e.g., academic tutor or supervisor).</p> |
| <i>Data collection</i>                 |                                                                                    |                                                                                                                                                                                                                                                                                                                                                                                                                                                                                                                                                                                                                                                                                                            |
| 17. Interview guide                    | Were questions, prompts, guides provided by the authors? Was it pilot tested?      | Yes. The questioning guide was pilot tested with students/staff who were not participants in this study.                                                                                                                                                                                                                                                                                                                                                                                                                                                                                                                                                                                                   |
| 18. Repeat interviews                  | Were repeat interviews carried out? If yes, how many?                              | No repeat interviews.                                                                                                                                                                                                                                                                                                                                                                                                                                                                                                                                                                                                                                                                                      |
| 19. Audio/visual recording             | Did the research use audio or visual recording to collect the data?                | Interviews and focus groups were audio-recorded using a video-conferencing platform. Interviewers kept cameras on to assist with establishing rapport.                                                                                                                                                                                                                                                                                                                                                                                                                                                                                                                                                     |
| 20. Field notes                        | Were field notes made during and/or after the interview or focus group?            | Yes.                                                                                                                                                                                                                                                                                                                                                                                                                                                                                                                                                                                                                                                                                                       |
| 21. Duration                           | What was the duration of the interviews or focus group?                            | Focus groups ranged from 58 to 90 minutes (mean: 68.8 minutes). Staff interviews were 29 to 69 minutes (mean: 44.5 minutes).                                                                                                                                                                                                                                                                                                                                                                                                                                                                                                                                                                               |
| 22. Data saturation                    | Was data saturation discussed?                                                     | Yes.                                                                                                                                                                                                                                                                                                                                                                                                                                                                                                                                                                                                                                                                                                       |
| 23. Transcripts returned               | Were transcripts returned to participants for comment and/or correction?           | No – due to time constraints (rapid project to inform service provision during the pandemic).                                                                                                                                                                                                                                                                                                                                                                                                                                                                                                                                                                                                              |
| <b>Domain 3: analysis and findings</b> |                                                                                    |                                                                                                                                                                                                                                                                                                                                                                                                                                                                                                                                                                                                                                                                                                            |
| <i>Data analysis</i>                   |                                                                                    |                                                                                                                                                                                                                                                                                                                                                                                                                                                                                                                                                                                                                                                                                                            |
| 24. Number of data coders              | How many data coders coded the data?                                               | Two.                                                                                                                                                                                                                                                                                                                                                                                                                                                                                                                                                                                                                                                                                                       |
| 25. Description of the coding tree     | Did authors provide a description of the coding tree?                              | No, however initial coding was informed by the interview guide, and coding was continuously refined.                                                                                                                                                                                                                                                                                                                                                                                                                                                                                                                                                                                                       |
| 26. Derivation of themes               | Were themes identified in advance or derived from the data?                        | These were derived from the data.                                                                                                                                                                                                                                                                                                                                                                                                                                                                                                                                                                                                                                                                          |
| 27. Software                           | What software, if applicable, was used to manage the data?                         | N³Vivo                                                                                                                                                                                                                                                                                                                                                                                                                                                                                                                                                                                                                                                                                                     |

|                                  |                                                                                                                                    |                                                                                               |
|----------------------------------|------------------------------------------------------------------------------------------------------------------------------------|-----------------------------------------------------------------------------------------------|
| 28. Participant checking         | Did participants provide feedback on the findings?                                                                                 | No – due to time constraints (rapid project to inform service provision during the pandemic). |
| <i>Reporting</i>                 |                                                                                                                                    |                                                                                               |
| 29. Quotations presented         | Were participant quotations presented to illustrate the themes / findings? Was each quotation identified? e.g., participant number | Yes.                                                                                          |
| 30. Data and findings consistent | Was there consistency between the data presented and the findings?                                                                 | Yes.                                                                                          |
| 31. Clarity of major themes      | Were major themes clearly presented in the findings?                                                                               | Yes.                                                                                          |
| 32. Clarity of minor themes      | Is there a description of diverse cases or discussion of minor themes?                                                             | Yes.                                                                                          |
